# Supplementary material for: A new genus of oryzomyine rodents (Cricetidae, Sigmodontinae) with three new species from montane cloud forests, western Andean cordillera of Colombia and Ecuador
Source: PeerJ. 2020 Nov 10;8:e10247. doi: 10.7717/peerj.10247 (PMC7664470; doi:10.7717/peerj.10247)
Supplement: Supplemental Information 4 [file peerj-08-10247-s004.xlsx]

## Sheet: Hoja1
Supplemental Information S4. —Access numbers and vouchers for taxa used in the phylogenetic analyses.
Species	Museum Number/Collector Number	Country	Gen Cytb	Gen IRBP	Source
Aegialomys xanthaeolus	MVZ 145533	Peru	EU579479	AY163628	Hanson & Bradley, Unpublished; Weksler (2003)
Amphinectomys savamis	MV 970045	Peru	EU579480	AY163579	Hanson & Bradley, Unpublished; Weksler (2003)
Cerradomys scotti	TK61881	Paraguay	EU579482		Hanson & Bradley, Unpublished; Weksler (2003)
Cerradomys vivoi	LMP 352 [Cytb] MNRJ61665 [IRBP]	Brazil	KR149683	AY163626	Weksler (2003); Tavares et al. (2016)
Delomys sublineatus	MVZ 183075 [Cytb], FMNH 141628 [IRBP]	Brazil	AF108687	AY163582	Smith & Patton (1999); Weksler (2003)
Drymoreomys albimaculatus	MVZ 182088	Brazil	EU579487	GU126515	Hanson & Bradley, Unpublished; Weksler (2003)
Eremoryzomys polius	FMNH 129243	Peru	GU126540	AY163624	Percequillo et al. (2011); Weksler (2003)
Euryoryzomys lamia	CRB 983 [Cytb], MN 46654 [IRBP]	Brazil	GU126537	AY163619	Percequillo et al. (2011); Weksler (2003)
Euryoryzomys macconnelli	AMNH 272669 [Cytb], AMNH 272678 [IRBP]	Peru	GU126538	AY163620	Percequillo et al. (2011); Weksler (2003)
Euryoryzomys nitidus	MSB 166027	Peru	AF251529		Patton et al. (2000)
Euryoryzomys russatus	ORG 67	Brazil	EU579486	AY163625	Hanson & Bradley, Unpublished; Weksler (2003)
Handleyomys alfaroi	ROM 97302	Costa Rica	KP778390	KP779554	Almendra et al. (2014)
Handleyomys chapmani	BYU15300	Mexico	KF658352	KP779556	Almendra et al. (2014)
Handleyomys intectus	ICN 16093	Colombia	EU579490	AY163584	Hanson & Bradley, Unpublished; Weksler (2003)
Handleyomys rostratus	ROM 101843	El Salvador	GU126541	AY163622	Percequillo et al. (2011); Weksler (2003)
Handleyomys saturatior	ROM1 01537	El Salvador	EU579494		Hanson & Bradley, Unpublished
Holochilus chacarius	UMMZ 166526	Argentina	KP970154	KP970217	D'Elia et al. (2015)
Holochilus sciureus	NK 102248	Bolivia	EU579497		Hanson & Bradley, Unpublished; Weksler (2003)
Holochilus vulpinus	GD 081	Paraguay	GU126517	AY163585	Weksler (2003)
Hylaeamys laticeps	ML 101	Brazil	AF251522		Patton et al. (2000)
Hylaeamys megacephalus	MHNLS 8061	Venezuela	EU579499	AY163621	Hanson & Bradley, Unpublished; Weksler (2003)
Hylaeamys perenensis	MVZ 166676	Peru	KY754003		Steppan & Schenk (2017)
Hylaeamys yunganus	CMNH 76926	Suriname	EU579500	AY163629	Hanson and Bradley Unpublished; Weksler 2003
Lundomys molitor	MNHN 4292	Uruguay	KP970126	AY163589	D'Elia et al. (2015); Weksler (2003)
Melanomys caliginosus	TTU 102819	Ecuador	EU340020	EU649052	Hanson & Bradley, Unpublished
Melanomys chrysomelas	TTU 100324	Nicaragua	EU340017	EU649053	Hanson & Bradley, Unpublished
Melanomys columbianus	MHNLS 7698	Venezuela	EU340022	AY163590	Hanson & Bradley, Unpublished; Weksler (2003)
Microryzomys minutus	MVZ 173975 [Cytb] MVZ 166666 [IRBP]	Peru	AF108698	AY163592	Smith & Patton (1999); Weksler (2003)
Mindomys hammondi	ROM 1055820	Ecuador	MT700428	MT700435	This study
Neacomys minutus	AMNH 272867	Peru	GU126519	AY163595	Percequillo et al. (2011); Weksler (2003)
Neacomys musseri	AMNH 272676	Peru	EU579503	AY163596	Hanson & Bradley, Unpublished; Weksler (2003)
Neacomys paracou	ROM 114315	Suriname	KP778269		Almendra et al. (2014)
Neacomys spinosus	MVZ 155014	Peru	EU579504	AY163597	Hanson & Bradley, Unpublished; Weksler (2003)
Nectomys apicalis	MVZ 166700	Peru	EU340013	EU649056	Hanson & Bradley, Unpublished; Weksler (2003)
Nectomys squamipes	FMNH 141632	Brazil	GU126522	AY163598	Percequillo et al. (2011); Weksler (2003)
Nephelomys albigularis	AMNH 268125	Peru	EU579505	AY163614	Hanson & Bradley, Unpublished; Weksler (2003)
Nephelomys albigularis	QCAZ 4287	Ecuador	Pending		This study
Nephelomys devius	ROM 97317 [Cytb] ROM 97316 [IRBP]	Costa Rica	KP778275	KP779491	Almendra et al. (2014)
Nephelomys keyasi	MVZ 173987	Peru	MVZ 173987	KC953414	Schenk et al. (2013)
Nephelomys levipes	MVZ 171468 [Cytb] MVZ 166680 [IRBP]	Peru	JF693875	KC953415	Pine et al. (2012); Schenk et al. (2013)
Nephelomys moerex	TEL1447 [Cytb], TEL1663 [IRBP]	Ecuador	DQ224407	EU649057	Amman et al. Unpublished; Hanson & Bradley, Unpublished
Nesoryzomys fernandinae	ASNCH 10580	Ecuador	EU579506		Hanson & Bradley, Unpublished; Weksler (2003)
Nesoryzomys narboroughi	ASNHC 8675	Ecuador	GU126523	AY163600	Percequillo et al. (2011); Weksler (2003)
Nesoryzomys swarthi	ASNHC 10003	Ecuador	GU126524	AY163601	Percequillo et al. (2011); Weksler (2003)
Nyctomys sumichrasti	TTU 84484 [Cytb] ROM 101531 [IRBP]	Honduras/El Salvador	AY195801	AY163603	Bradley et al. (2004); Weksler (2003)
Oecomys auyantepui	V-1001	French Guiana	AJ496305		Mauffrey et al. Unpublished
Oecomys bicolor	MVZ 154999 [Cytb] AMNH 272674 [IRBP]	Peru	AF108699	AY163604	Smith & Patton (1999); Weksler (2003)
Oecomys catherinae	MF 29	Brazil	GU126525	AY163605	Percequillo et al. (2011); Weksler (2003)
Oecomys franciscorum	MVZ 198026	Brazil	GU126526	AY163607	Percequillo et al. (2011); Weksler (2003)
Oecomys paricola	LPC 525	Brazil	HM594591		Rocha et al. (2011)
Oecomys roberti	UFPB 494	Brazil	FJ361072		Miranda et al. Unpublished
Oecomys trinitatis	MUSM 13320	Peru	GU126527	AY163608	Percequillo et al. (2011); Weksler (2003)
Oligoryzomys delicatus	AMNH 257262	Venezuela	GU126529	AY163611	Weksler (2003)
Oligoryzomys flavescens	MN 53276 [IRBP], CRB 1430 [Cytb]	Brazil	GU126528	AY163609	Percequillo et al. (2011); Weksler (2003)
Oligoryzomys fulvescens	AMNH 257262	Venezuela	GU126529	AY163611	Percequillo et al. (2011); Weksler (2003)
Oligoryzomys longicaudatus	MVZ 155842	-	U03535		Percequillo et al. (2011); Weksler (2003)
Oligoryzomys mattogrossae	UFES 1440	Brazil	HM594622		Rocha et al. (2011)
Oligoryzomys nigripes	MN 66222	Brazil	GU126530	AY163612	Percequillo et al. (2011); Weksler (2003)
Oligoryzomys stramineus	MN 46406 [IRBP] MN 46873 [Cytb]	Brazil	GU126531	AY163613	Percequillo et al. (2011); Weksler (2003)
Oreoryzomys balneator	AMNH 268144	Peru	EU579510	AY163617	Hanson & Bradley, Unpublished; Weksler (2003)
Oryzomys couesi	TTU 37749	México	GU126536	AY163618	Percequillo et al. (2011); Weksler (2003)
Oryzomys palustris	TTU 75311	USA	GU126539	AY163623	Percequillo et al. (2011); Weksler (2003)
Pattonimus ecominga	MECN 5298	Ecuador	MT700418		This study
Pattonimus ecominga	JBM 1688	Ecuador	MT700413		This study
Pattonimus ecominga	MECN 6040	Ecuador	MT700414	MT700432	This study
Pattonimus ecominga	MECN 5927	Ecuador	MT700417		This study
Pattonimus ecominga	MECN 6041	Ecuador	MT700415		This study
Pattonimus ecominga	MECN 6042	Ecuador	MT700416	MT700433	This study
Pattonimus ecominga	MEPN 12092	Ecuador	MT700419		This study
Pattonimus musseri	MEPN 12586	Ecuador	MT700423	MT700429	This study
Pattonimus musseri	MEPN 12593	Ecuador	MT700421	MT700430	This study
Pattonimus musseri	MEPN 12605	Ecuador	MT700422	MT700431	This study
Pattonimus musseri	MEPN 12587	Ecuador	MT700420		This study
Pattonimus sp.	QCAZ 8720	Ecuador	MT700427	MT700434	This study
Peromyscus maniculatus	UMMZ 165752 [Cytb], TTU 81622 [IRBP]	USA/México	AY322508	AY163630	Bradley et al. (2004); Weksler (2003)
Pseudoryzomys simplex	GD 65	Paraguay	GU126547	AY163633	Percequillo et al. (2011); Weksler (2003)
Rhipidomys nitela	MZUSP 21316 [Cytb], MHNLS 7820 [IRBP]	Brazil/Venezuela	AF108682	AY163636	Smith & Patton 1999; Weksler (2003)
Scolomys ucayalensis	INPA 2489 [Cytb], AMNH 272721 [IRBP]	Brazil/Peru	AF108696	AY163638	Smith & Patton 1999; Weksler (2003)
Sigmodontomys alfari	USNM 449895	Panamá	GU126548	AY163641	Percequillo et al. (2011); Weksler (2003)
Sooretamys angouya	MN 50234	Brazil	EU579511	AY163616	Hanson & Bradley, Unpublished; Weksler (2003)
Tanyuromys aphrastus	KU 161003	Costa Rica	JF693877	JF693878	Pine et al. (2012); Weksler (2003)
Tanyuromys thomasleei	QCAZ 10427	Ecuador	FJ971254		Hanson & Bradley, Unpublished; Timm et al. (2018)
Tanyuromys thomasleei	JBM 1753	Ecuador	MT700424	MT700436	This study
Tanyuromys thomasleei	JBM 2222	Ecuador	MT700425		This study
Tanyuromys thomasleei	JBM 2246	Ecuador	MT700426		This study
Thomasomys baeops	MSB 70704 [Cytb], AMNH 268146 [IRBP]	Ecuador/Peru	DQ914654	AY163642	Salazar-Bravo & Yates (2007)
Transandinomys bolivaris	TK 135687	Ecuador	EU579513		Hanson & Bradley, Unpublished
Transandinomys talamancae	USNM 449894	Panamá	GU126544	AY163627	Percequillo et al. (2011); Weksler (2003)
Wiedomys pyrrhorhinos	MN 67023	Brazil	KF317055	AY163644	Goncalves et al. (2005); Weksler (2003)
Zygodontomys brevicauda	AMNH 257321	Venezuela	GU126549	AY163645	Percequillo et al. (2011); Weksler (2003)
Zygodontomys cherriei	USNM 448665	Venezuela	GU126550	AY163646	Percequillo et al. (2011); Weksler (2003)
REFERENCES
Weksler M. 2003. Phylogeny of Neotropical oryzomyine rodents (Muridae: Sigmodontinae) based on the nuclear IRBP exon. Molecular Phylogenetics and Evolution 29:331–349.
Tavares WC, Pessôa LM, Seuánez HN. 2016. Systematics and acceleration of cranial evolution in Cerradomys (Rodentia, Cricetidae, Sigmodontinae) of Quaternary sandy plains in Southeastern Brazil. Journal of Mammalian Evolution 23:281-296.
Smith MF, Patton JL. 1993. The diversification of South American murid rodents: evidence from mitochondrial DNA sequence data for the akodontine tribe. Biological Journal of the Linnean Society 50:149–177.
Percequillo AR, Weksler M, Costa LP. 2011. A new genus and species of rodent from the Brazilian Atlantic Forest (Rodentia: Cricetidae: Sigmodontinae: Oryzomyini), with comments on oryzomyine biogeography. Zoological Journal of the Linnean Society 161:357–390.
Almendra AL, Rogers DS, González-Cózatl FX. 2014. Molecular phylogenetics of the Handleyomys chapmani complex in Mesoamerica. Journal of Mammalogy 95:26-40.
Patton JL, Da Silva MNF, Malcolm JR. 2000. Mammals of the Río Juruá and the evolutionary andecological diversification of Amazonia. Bulletin ofthe American Museum of Natural History 244:1-306.
D’Elía G, Hanson JD, Mauldin MR, Teta P, Pardiñas UF. 2015. Molecular systematics of South American marsh rats of the genus Holochilus (Muroidea, Cricetidae, Sigmodontinae). Journal of Mammalogy 96:1081-1094.
Schenk JJ, Rowe KC, Steppan SJ. 2013. Ecological opportunity and incumbency in the diversification of repeated continental colonizations by muroid rodents. Systematic biology 62:837-864.
Pine RH, Timm RM, Weksler M. 2012. A newly recognized clade of trans-Andean Oryzomyini (Rodentia: Cricetidae), with description of a new genus. Journal of Mammalogy 93:851–870
Bradley RD., Edwards CW, Carroll DS, Kilpatrick CW. 2004. Phylogenetic relationships of neotomine-peromyscine rodents: based on DNA sequences from the mitochondrial cytochrome-b gene. Journal of Mammalogy 85:389-395.
Smith MF, Patton JL, 1999. Phylogenetic relationships and the radiation of Sig-modontine rodents in South America: evidences from cytochrome b. Journal of Mammalian Evolution 6:89–128.
Rocha RG, Fonseca C, Zhou Z, Leite YL, Costa LP. 2012. Taxonomic and conservation status of the elusive Oecomys cleberi (Rodentia, Sigmodontinae) from central Brazil. Mammalian Biology 77:414-419.
Salazar-Bravo J, Yates TL. 2007. A new species of Thomasomys (Cricetidae: Sigmodontinae) from central Bolivia. Pp. 747–774 in The quintessential naturalist: Honoring the life and legacy of Oliver P. Pearson. University of California Publications in Zoology Berkeley.
Gonçalves PR, Almeida FC, Bonvicino CR. 2005. A new species of Wiedomys (Rodentia: Sigmodontinae) from Brazilian Cerrad. Mammalian Biology 70:46-60.
